# Supplementary material
Source: PubMed Central journal article supplement (PMC4541040)
Supplement: supp_jcs.158436_JCS158436supp.pdf [file supp_jcs.158436_JCS158436supp.pdf]

## **Supplementary Figures**

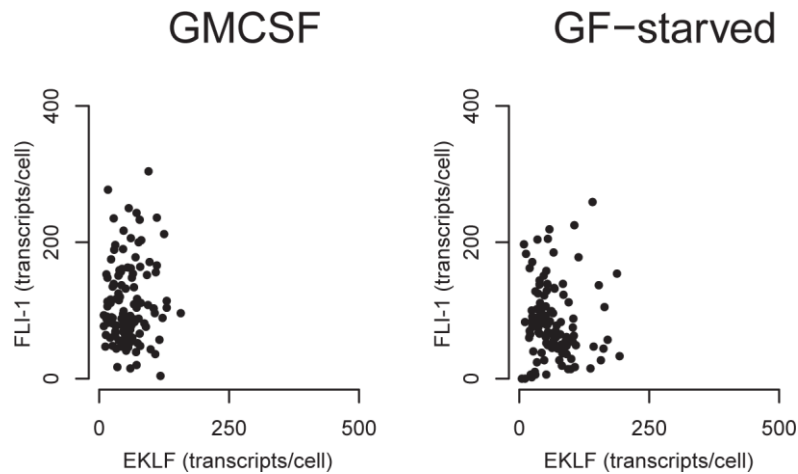

**Figure S1. Correlation between EKL and FLI-1 levels before treatment**

UT-7/GM cells maintained in GMCSF were growth-factor starved for 18 hours. Cells were fixed before and after starvation and the mRNA FISH method was used to obtain transcript counts for EKL and FLI-1 in individual cells. Phase plots show the degree of correlation between transcription factors before treatment with cytokines.

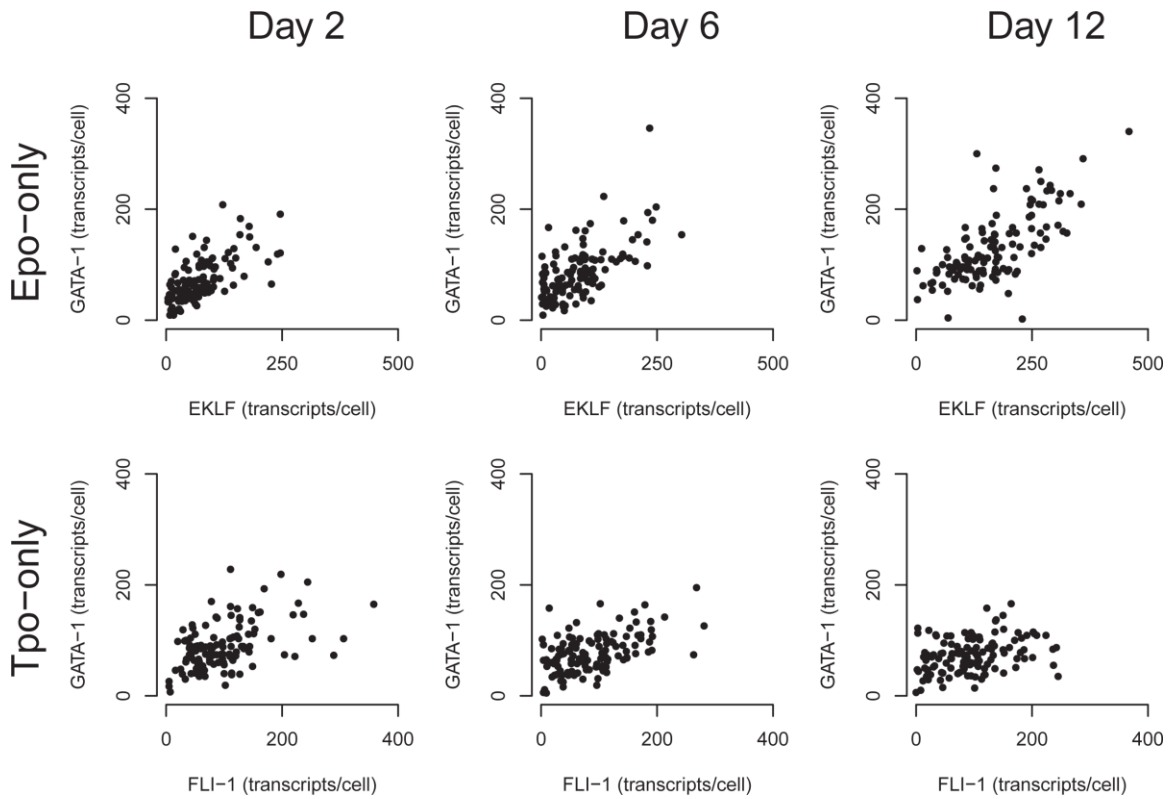

**Figure S2. Correlation of GATA-1 levels with EKL and FLI-1 under Epo and Tpo treatment**

UT-7/GM cells maintained in GMCSF were growth-factor starved for 18 hours, and subsequently passaged into medium containing only Epo or only Tpo. mRNA FISH was used to obtain transcript counts for GATA-1, EKL, and FLI-1 in individual cells. Phase plots show the degree of correlation between transcription factors.

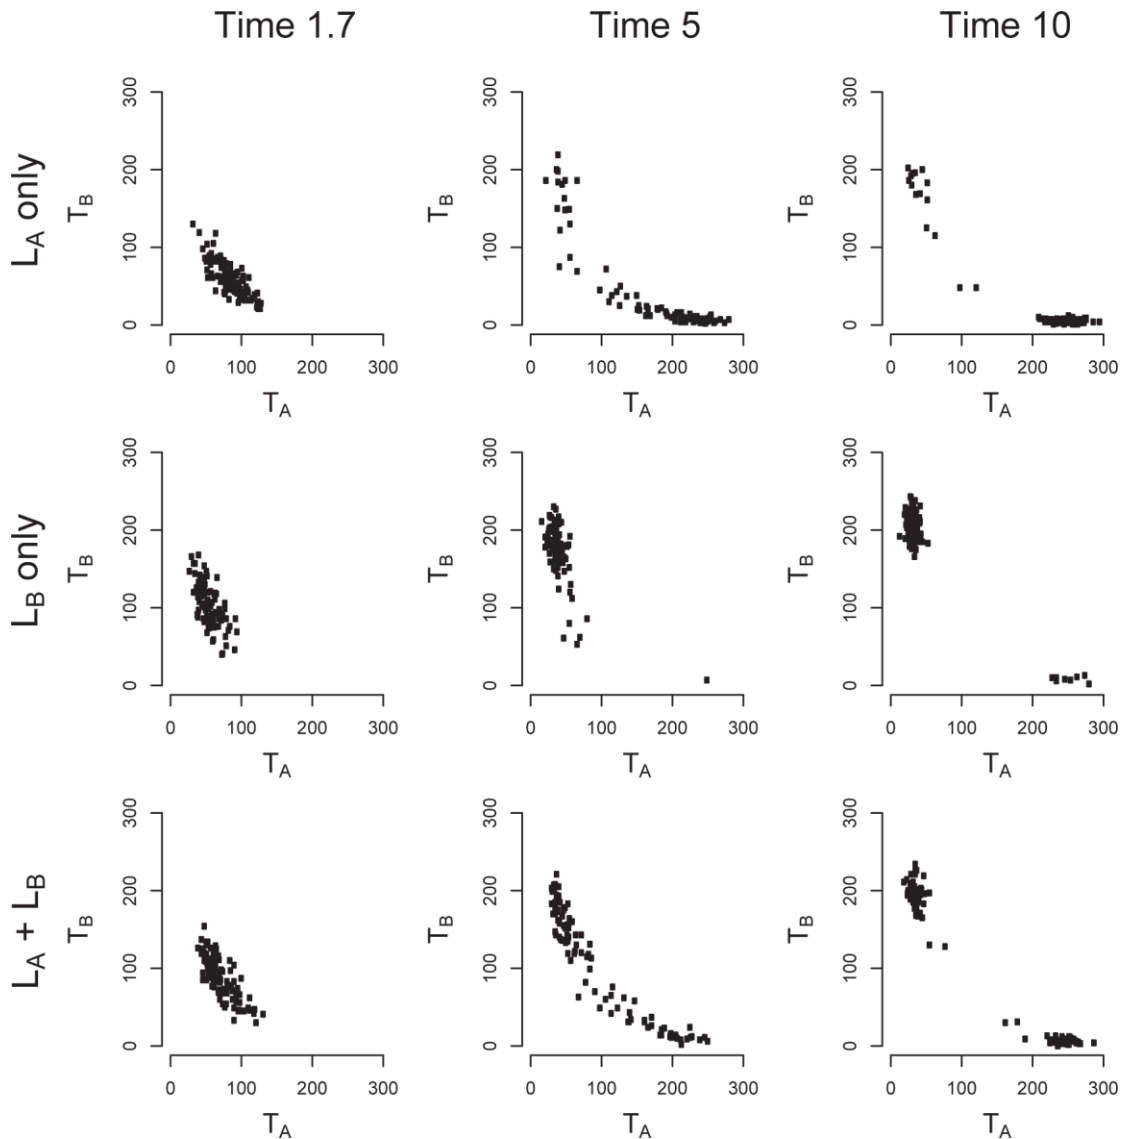

**Figure S3. Simulated master transcription factor dynamics under different treatment regimes**

The ECAA model was stochastically simulated under different ligand concentrations:  $L_A$  only ( $L_A = 1000$ ,  $L_B = 0$ ),  $L_B$  only ( $L_A = 0$ ,  $L_B = 1000$ ), and  $L_A + L_B$  ( $L_A = 1000$ ,  $L_B = 1000$ ). For each treatment condition, 100 separate simulations were performed, yielding 100 trajectories. Plots show snapshots of trajectories at different times. Each simulation was started in the bipotent state ( $T_A = 60$ ,  $T_B = 70$ ). Simulation results show that under the given parameters, the ECAA model yields discrete decisions, which can be influenced by extrinsic cues.

## **Table S1**

[Click here to Download Table S1](#)
